# Supplementary material for: Histological and immunohistochemical characterization of feline renal cell carcinoma: a case series
Source: PubMed Central journal article supplement — J Vet Med Sci. 2016 Feb 18;78(6):1039–43. doi: 10.1292/jvms.15-0697 (PMC4937140; doi:10.1292/jvms.15-0697), 2016-02-18
Supplement: jvms-78-1039-s001.pdf [file jvms-78-1039-s001.pdf]

**Table S1.** Antibody Source and Dilution used for Immunohistochemistry

| <b>Marker</b>       | <b>Supplier</b>             | <b>Clone</b>    | <b>Dilution</b> |
|---------------------|-----------------------------|-----------------|-----------------|
| <b>Cytokeratins</b> | Dako                        | AE1/AE3         | 1:100           |
| <b>CD10</b>         | Leica microsystems          | 56C6            | 1:200           |
| <b>VEGF</b>         | Santa Cruz<br>Biotechnology | A20             | 1:100           |
| <b>VEGF-R2</b>      | Santa Cruz<br>Biotechnology | A-3             | 1:50            |
| <b>B-catenin</b>    | BD                          | 14/Beta-Catenin | 1:100           |
| <b>E-cadherin</b>   | BD                          | 36/E-Cadherin   | 1:120           |
| <b>Vimentin</b>     | Dako                        | V9              | 1:150           |
| <b>c-kit</b>        | Dako                        | Polyclonal      | 1:300           |

Secondary antibody: horseradish peroxidase (HRP)-conjugated polymer anti- mouse and anti-rabbit Universal DAB Detection Kit and ultraViews Universal Alkaline Phosphatase Red Detection Kit, Ventana Medical Systems Inc., Tucson, AZ, U.S.A.
